# Supplementary material for: Female moths incorporate plant acoustic emissions into their oviposition decision-making process
Source: eLife journal article supplement (doi:10.7554/elife.104700), 2024-12-27
Supplement: data1 [file data.xlsx]

## Sheet: data
#Experiment	Experiment	Season	Month	Observation date	Arena	Repetition	Type of control	Side of speaker	Number of females	Side examined	Clusters of eggs
1	Wet-dry plant	1	6	2021-07-13	11	218	wet	left	5	Dry	1
1	Wet-dry plant	1	6	2021-07-13	11	218	wet	left	5	Wet	3
1	Wet-dry plant	1	5	2021-05-18	11	202	wet	right	15	Dry	4
1	Wet-dry plant	1	5	2021-05-18	11	202	wet	right	15	Wet	11
1	Wet-dry plant	1	5	2021-05-18	12	203	wet	left	15	Dry	0
1	Wet-dry plant	1	5	2021-05-18	12	203	wet	left	15	Wet	5
1	Wet-dry plant	1	5	2021-05-18	13	204	wet	left	15	Dry	0
1	Wet-dry plant	1	5	2021-05-18	13	204	wet	left	15	Wet	2
1	Wet-dry plant	1	5	2021-05-19	12	205	wet	right	8	Dry	2
1	Wet-dry plant	1	5	2021-05-19	12	205	wet	right	8	Wet	1
1	Wet-dry plant	1	5	2021-05-19	11	206	wet	right	8	Dry	0
1	Wet-dry plant	1	5	2021-05-19	11	206	wet	right	8	Wet	0
1	Wet-dry plant	1	5	2021-05-19	13	207	wet	right	8	Dry	1
1	Wet-dry plant	1	5	2021-05-19	13	207	wet	right	8	Wet	0
1	Wet-dry plant	1	5	2021-05-20	11	208	wet	left	19	Dry	0
1	Wet-dry plant	1	5	2021-05-20	11	208	wet	left	19	Wet	1
1	Wet-dry plant	1	5	2021-05-20	12	209	wet	left	19	Dry	2
1	Wet-dry plant	1	5	2021-05-20	12	209	wet	left	19	Wet	3
1	Wet-dry plant	1	5	2021-05-30	13	210	wet	left	8	Dry	0
1	Wet-dry plant	1	5	2021-05-30	13	210	wet	left	8	Wet	2
1	Wet-dry plant	1	5	2021-05-30	12	211	wet	left	8	Dry	0
1	Wet-dry plant	1	5	2021-05-30	12	211	wet	left	8	Wet	1
1	Wet-dry plant	1	5	2021-05-31	13	212	wet	right	12	Dry	1
1	Wet-dry plant	1	5	2021-05-31	13	212	wet	right	12	Wet	0
1	Wet-dry plant	1	5	2021-05-31	12	213	wet	right	13	Dry	2
1	Wet-dry plant	1	5	2021-05-31	12	213	wet	right	13	Wet	1
1	Wet-dry plant	1	6	2021-06-06	13	214	wet	right	15	Dry	0
1	Wet-dry plant	1	6	2021-06-06	13	214	wet	right	15	Wet	2
1	Wet-dry plant	1	6	2021-06-06	12	215	wet	right	12	Dry	1
1	Wet-dry plant	1	6	2021-06-06	12	215	wet	right	12	Wet	0
1	Wet-dry plant	1	6	2021-06-11	12	216	wet	left	6	Dry	1
1	Wet-dry plant	1	6	2021-06-11	12	216	wet	left	6	Wet	2
1	Wet-dry plant	1	6	2021-06-11	13	217	wet	right	5	Dry	0
1	Wet-dry plant	1	6	2021-06-11	13	217	wet	right	5	Wet	4
2	Drought sounds_60 per minute	1	8	2019-08-14	3	8	silent	NaN	NaN	Drought sounds	1
2	Drought sounds_60 per minute	1	8	2019-08-14	3	8	silent	NaN	NaN	Silence	2
2	Drought sounds_60 per minute	1	8	2019-08-14	3	9	silent	NaN	NaN	Drought sounds	3
2	Drought sounds_60 per minute	1	8	2019-08-14	3	9	silent	NaN	NaN	Silence	0
2	Drought sounds_60 per minute	1	8	2019-08-15	2	7	silent	NaN	NaN	Drought sounds	0
2	Drought sounds_60 per minute	1	8	2019-08-15	2	7	silent	NaN	NaN	Silence	1
2	Drought sounds_60 per minute	1	8	2019-08-15	3	9	silent	NaN	NaN	Drought sounds	1
2	Drought sounds_60 per minute	1	8	2019-08-15	3	9	silent	NaN	NaN	Silence	0
2	Drought sounds_60 per minute	1	9	2019-09-13	1	10	silent	NaN	8	Drought sounds	0
2	Drought sounds_60 per minute	1	9	2019-09-13	1	10	silent	NaN	8	Silence	1
2	Drought sounds_60 per minute	1	9	2019-09-13	2	11	silent	NaN	10	Drought sounds	1
2	Drought sounds_60 per minute	1	9	2019-09-13	2	11	silent	NaN	10	Silence	0
2	Drought sounds_60 per minute	1	9	2019-09-15	2	11	silent	NaN	10	Drought sounds	1
2	Drought sounds_60 per minute	1	9	2019-09-15	2	11	silent	NaN	10	Silence	0
2	Drought sounds_60 per minute	1	9	2019-09-15	3	12	silent	NaN	10	Drought sounds	2
2	Drought sounds_60 per minute	1	9	2019-09-15	3	12	silent	NaN	10	Silence	0
2	Drought sounds_60 per minute	1	9	2019-09-16	1	10	silent	NaN	8	Drought sounds	1
2	Drought sounds_60 per minute	1	9	2019-09-16	1	10	silent	NaN	8	Silence	0
2	Drought sounds_60 per minute	1	9	2019-09-16	4	13	silent	NaN	10	Drought sounds	1
2	Drought sounds_60 per minute	1	9	2019-09-16	4	13	silent	NaN	10	Silence	0
2	Drought sounds_60 per minute	1	9	2019-09-23	1	14	resistor	NaN	8	Drought sounds	1
2	Drought sounds_60 per minute	1	9	2019-09-23	1	14	resistor	NaN	8	Silence	0
2	Drought sounds_60 per minute	1	9	2019-09-23	2	15	resistor	NaN	8	Drought sounds	1
2	Drought sounds_60 per minute	1	9	2019-09-23	2	15	resistor	NaN	8	Silence	1
2	Drought sounds_60 per minute	1	9	2019-09-23	3	16	silent	NaN	8	Drought sounds	2
2	Drought sounds_60 per minute	1	9	2019-09-23	3	16	silent	NaN	8	Silence	0
2	Drought sounds_60 per minute	1	9	2019-09-24	1	14	resistor	NaN	8	Drought sounds	1
2	Drought sounds_60 per minute	1	9	2019-09-24	1	14	resistor	NaN	8	Silence	0
2	Drought sounds_60 per minute	1	9	2019-09-24	3	16	silent	NaN	8	Drought sounds	1
2	Drought sounds_60 per minute	1	9	2019-09-24	3	16	silent	NaN	8	Silence	0
2	Drought sounds_60 per minute	1	9	2019-09-24	4	17	silent	NaN	7	Drought sounds	1
2	Drought sounds_60 per minute	1	9	2019-09-24	4	17	silent	NaN	7	Silence	0
2	Drought sounds_60 per minute	1	9	2019-09-25	1	14	resistor	NaN	8	Drought sounds	1
2	Drought sounds_60 per minute	1	9	2019-09-25	1	14	resistor	NaN	8	Silence	0
2	Drought sounds_60 per minute	2	2	2020-02-11	3	128	resistor	left	8	Drought sounds	2
2	Drought sounds_60 per minute	2	2	2020-02-11	3	128	resistor	left	8	Silence	0
2	Drought sounds_60 per minute	2	2	2020-02-13	3	142	resistor	left	15	Drought sounds	1
2	Drought sounds_60 per minute	2	2	2020-02-13	3	142	resistor	left	15	Silence	0
2	Drought sounds_60 per minute	2	11	2020-05-11	3	135	resistor	left	10	Drought sounds	0
2	Drought sounds_60 per minute	2	11	2020-05-11	3	135	resistor	left	10	Silence	1
2	Drought sounds_60 per minute	2	11	2020-06-11	1	136	resistor	right	8	Drought sounds	1
2	Drought sounds_60 per minute	2	11	2020-06-11	1	136	resistor	right	8	Silence	0
2	Drought sounds_60 per minute	2	11	2020-06-11	3	137	resistor	right	8	Drought sounds	1
2	Drought sounds_60 per minute	2	11	2020-06-11	3	137	resistor	right	8	Silence	1
2	Drought sounds_60 per minute	2	12	2020-07-12	3	141	resistor	left	8	Drought sounds	0
2	Drought sounds_60 per minute	2	12	2020-07-12	3	141	resistor	left	8	Silence	1
2	Drought sounds_60 per minute	2	11	2020-11-17	3	139	resistor	right	10	Drought sounds	1
2	Drought sounds_60 per minute	2	11	2020-11-17	3	139	resistor	right	10	Silence	0
2	Drought sounds_60 per minute	2	11	2020-11-18	3	140	resistor	left	8	Drought sounds	1
2	Drought sounds_60 per minute	2	11	2020-11-18	3	140	resistor	left	8	Silence	0
2	Drought sounds_60 per minute	2	11	2020-12-11	3	138	resistor	right	8	Drought sounds	1
2	Drought sounds_60 per minute	2	11	2020-12-11	3	138	resistor	right	8	Silence	1
2	Drought sounds_60 per minute	2	3	2021-03-03	3	144	silent	left	15	Drought sounds	0
2	Drought sounds_60 per minute	2	3	2021-03-03	3	144	silent	left	15	Silence	1
2	Drought sounds_60 per minute	2	3	2021-03-03	2	145	resistor	right	15	Drought sounds	1
2	Drought sounds_60 per minute	2	3	2021-03-03	2	145	resistor	right	15	Silence	0
2	Drought sounds_60 per minute	2	3	2021-03-17	3	149	resistor	left	12	Drought sounds	1
2	Drought sounds_60 per minute	2	3	2021-03-17	3	149	resistor	right	12	Drought sounds	0
2	Drought sounds_60 per minute	2	3	2021-03-17	3	149	resistor	left	12	Silence	0
2	Drought sounds_60 per minute	2	3	2021-03-17	3	149	resistor	right	12	Silence	1
2	Drought sounds_60 per minute	2	3	2021-03-31	3	152	resistor	left	7	Drought sounds	1
2	Drought sounds_60 per minute	2	3	2021-03-31	3	152	resistor	left	7	Silence	0
2	Drought sounds_60 per minute	2	4	2021-04-18	2	154	silent	left	9	Drought sounds	1
2	Drought sounds_60 per minute	2	4	2021-04-18	2	154	silent	left	9	Silence	0
2	Drought sounds_60 per minute	2	4	2021-04-21	2	155	silent	right	10	Drought sounds	1
2	Drought sounds_60 per minute	2	4	2021-04-21	2	155	silent	right	10	Silence	0
2	Drought sounds_60 per minute	2	4	2021-04-22	1	156	resistor	right	8	Drought sounds	2
2	Drought sounds_60 per minute	2	4	2021-04-22	1	156	resistor	right	8	Silence	0
2	Drought sounds_60 per minute	2	4	2021-04-30	3	157	resistor	left	8	Drought sounds	1
2	Drought sounds_60 per minute	2	4	2021-04-30	3	157	resistor	left	8	Silence	0
2	Drought sounds_60 per minute	2	4	2021-05-01	3	158	resistor	right	10	Drought sounds	1
2	Drought sounds_60 per minute	2	4	2021-05-01	3	158	resistor	right	10	Silence	0
2	Drought sounds_60 per minute	2	3	2021-05-03	3	146	resistor	left	15	Drought sounds	2
2	Drought sounds_60 per minute	2	3	2021-05-03	3	146	resistor	left	15	Silence	0
2	Drought sounds_60 per minute	2	5	2021-05-05	1	159	resistor	left	12	Drought sounds	3
2	Drought sounds_60 per minute	2	5	2021-05-05	1	159	resistor	left	12	Silence	0
2	Drought sounds_60 per minute	2	5	2021-06-05	1	160	resistor	right	14	Drought sounds	3
2	Drought sounds_60 per minute	2	5	2021-06-05	1	160	resistor	right	14	Silence	1
2	Drought sounds_60 per minute	2	3	2021-07-03	3	147	resistor	right	15	Drought sounds	0
2	Drought sounds_60 per minute	2	3	2021-07-03	3	147	resistor	right	15	Silence	1
2	Drought sounds_60 per minute	2	5	2021-08-05	1	161	resistor	left	13	Drought sounds	3
2	Drought sounds_60 per minute	2	5	2021-08-05	1	161	resistor	left	13	Silence	3
2	Drought sounds_60 per minute	2	4	2021-09-04	3	153	resistor	right	9	Drought sounds	0
2	Drought sounds_60 per minute	2	4	2021-09-04	3	153	resistor	right	9	Silence	1
2	Drought sounds_60 per minute	2	5	2021-10-05	1	162	resistor	right	14	Drought sounds	1
2	Drought sounds_60 per minute	2	5	2021-10-05	1	162	resistor	right	14	Silence	0
2	Drought sounds_60 per minute	2	5	2021-10-05	2	163	silent	right	12	Drought sounds	1
2	Drought sounds_60 per minute	2	5	2021-10-05	2	163	silent	right	12	Silence	0
2	Drought sounds_60 per minute	2	5	2021-10-05	3	164	resistor	left	13	Drought sounds	0
2	Drought sounds_60 per minute	2	5	2021-10-05	3	164	resistor	left	13	Silence	1
3	Deaf females drought sounds_60 per minute	1	2	2023-02-26	3	11	resistor	left	8	Silence	1
3	Deaf females drought sounds_60 per minute	1	3	2023-03-02	1	21	resistor	left	12	Silence	1
3	Deaf females drought sounds_60 per minute	1	3	2023-03-02	3	23	resistor	left	10	Silence	1
3	Deaf females drought sounds_60 per minute	1	3	2023-03-08	1	33	resistor	left	9	Silence	1
3	Deaf females drought sounds_60 per minute	1	3	2023-03-09	2	37	resistor	left	12	Silence	0
3	Deaf females drought sounds_60 per minute	1	3	2023-03-16	1	51	resistor	left	10	Silence	1
3	Deaf females drought sounds_60 per minute	1	4	2023-04-18	1	54	resistor	left	8	Silence	0
3	Deaf females drought sounds_60 per minute	1	5	2023-05-09	1	68	resistor	left	6	Silence	0
3	Deaf females drought sounds_60 per minute	1	2	2023-02-27	3	14	resistor	left	10	Silence	0
3	Deaf females drought sounds_60 per minute	1	3	2023-03-01	2	19	resistor	left	8	Silence	1
3	Deaf females drought sounds_60 per minute	1	3	2023-03-09	3	38	resistor	left	11	Silence	1
3	Deaf females drought sounds_60 per minute	1	3	2023-03-14	1	45	resistor	left	10	Silence	0
3	Deaf females drought sounds_60 per minute	1	5	2023-05-23	1	76	resistor	left	8	Silence	0
3	Deaf females drought sounds_60 per minute	1	5	2023-05-29	1	80	resistor	left	8	Silence	1
3	Deaf females drought sounds_60 per minute	1	3	2023-03-05	2	25	resistor	left	8	Silence	2
3	Deaf females drought sounds_60 per minute	1	4	2023-04-19	1	56	resistor	left	8	Silence	3
3	Deaf females drought sounds_60 per minute	1	4	2022-04-12	2	2	resistor	right	10	Silence	1
3	Deaf females drought sounds_60 per minute	1	3	2023-03-05	1	24	resistor	right	9	Silence	0
3	Deaf females drought sounds_60 per minute	1	3	2023-03-07	1	30	resistor	right	11	Silence	0
3	Deaf females drought sounds_60 per minute	1	4	2023-04-19	2	57	resistor	right	13	Silence	1
3	Deaf females drought sounds_60 per minute	1	5	2023-05-22	1	74	resistor	right	8	Silence	1
3	Deaf females drought sounds_60 per minute	1	5	2023-05-08	1	66	resistor	right	12	Silence	3
3	Deaf females drought sounds_60 per minute	1	2	2023-02-28	2	16	resistor	right	12	Silence	4
3	Deaf females drought sounds_60 per minute	1	2	2023-02-26	3	11	resistor	left	8	Drought sounds	0
3	Deaf females drought sounds_60 per minute	1	3	2023-03-02	1	21	resistor	left	12	Drought sounds	0
3	Deaf females drought sounds_60 per minute	1	3	2023-03-02	3	23	resistor	left	10	Drought sounds	0
3	Deaf females drought sounds_60 per minute	1	3	2023-03-08	1	33	resistor	left	9	Drought sounds	0
3	Deaf females drought sounds_60 per minute	1	3	2023-03-09	2	37	resistor	left	12	Drought sounds	1
3	Deaf females drought sounds_60 per minute	1	3	2023-03-16	1	51	resistor	left	10	Drought sounds	0
3	Deaf females drought sounds_60 per minute	1	4	2023-04-18	1	54	resistor	left	8	Drought sounds	1
3	Deaf females drought sounds_60 per minute	1	5	2023-05-09	1	68	resistor	left	6	Drought sounds	1
3	Deaf females drought sounds_60 per minute	1	2	2023-02-27	3	14	resistor	left	10	Drought sounds	2
3	Deaf females drought sounds_60 per minute	1	3	2023-03-01	2	19	resistor	left	8	Drought sounds	1
3	Deaf females drought sounds_60 per minute	1	3	2023-03-09	3	38	resistor	left	11	Drought sounds	1
3	Deaf females drought sounds_60 per minute	1	3	2023-03-14	1	45	resistor	left	10	Drought sounds	2
3	Deaf females drought sounds_60 per minute	1	5	2023-05-23	1	76	resistor	left	8	Drought sounds	2
3	Deaf females drought sounds_60 per minute	1	5	2023-05-29	1	80	resistor	left	8	Drought sounds	1
3	Deaf females drought sounds_60 per minute	1	3	2023-03-05	2	25	resistor	left	8	Drought sounds	1
3	Deaf females drought sounds_60 per minute	1	4	2023-04-19	1	56	resistor	left	8	Drought sounds	0
3	Deaf females drought sounds_60 per minute	1	4	2022-04-12	2	2	resistor	right	10	Drought sounds	0
3	Deaf females drought sounds_60 per minute	1	3	2023-03-05	1	24	resistor	right	9	Drought sounds	1
3	Deaf females drought sounds_60 per minute	1	3	2023-03-07	1	30	resistor	right	11	Drought sounds	1
3	Deaf females drought sounds_60 per minute	1	4	2023-04-19	2	57	resistor	right	13	Drought sounds	0
3	Deaf females drought sounds_60 per minute	1	5	2023-05-22	1	74	resistor	right	8	Drought sounds	1
3	Deaf females drought sounds_60 per minute	1	5	2023-05-08	1	66	resistor	right	12	Drought sounds	0
3	Deaf females drought sounds_60 per minute	1	2	2023-02-28	2	16	resistor	right	12	Drought sounds	0
4	Drought sounds _2 per minute	1	1	2020-01-12	1	48	resistor	left	10	Drought sounds	0
4	Drought sounds _2 per minute	1	1	2020-01-12	1	48	resistor	left	10	Silence	1
4	Drought sounds _2 per minute	1	1	2020-01-13	2	50	silent	left	13	Drought sounds	1
4	Drought sounds _2 per minute	1	1	2020-01-13	2	50	silent	left	13	Silence	1
4	Drought sounds _2 per minute	1	1	2020-01-14	2	50	silent	left	13	Drought sounds	1
4	Drought sounds _2 per minute	1	1	2020-01-14	2	50	silent	left	13	Silence	0
4	Drought sounds _2 per minute	1	1	2020-01-15	2	50	silent	left	13	Drought sounds	1
4	Drought sounds _2 per minute	1	1	2020-01-15	2	50	silent	left	13	Silence	2
4	Drought sounds _2 per minute	1	2	2020-02-09	3	53	silent	left	10	Drought sounds	1
4	Drought sounds _2 per minute	1	2	2020-02-09	3	53	silent	left	10	Silence	0
4	Drought sounds _2 per minute	1	2	2020-02-10	2	52	resistor	right	11	Drought sounds	1
4	Drought sounds _2 per minute	1	2	2020-02-10	2	52	resistor	right	11	Silence	0
4	Drought sounds _2 per minute	1	2	2020-02-11	1	51	resistor	right	14	Drought sounds	2
4	Drought sounds _2 per minute	1	2	2020-02-11	1	51	resistor	right	14	Silence	0
4	Drought sounds _2 per minute	1	2	2020-02-12	2	52	resistor	right	11	Drought sounds	1
4	Drought sounds _2 per minute	1	2	2020-02-12	2	52	resistor	right	11	Silence	0
4	Drought sounds _2 per minute	1	2	2020-02-20	2	56	silent	left	14	Drought sounds	1
4	Drought sounds _2 per minute	1	2	2020-02-20	2	56	silent	left	14	Silence	0
4	Drought sounds _2 per minute	1	4	2020-04-07	1	78	resistor	left	14	Drought sounds	0
4	Drought sounds _2 per minute	1	4	2020-04-07	1	78	resistor	left	14	Silence	1
4	Drought sounds _2 per minute	1	4	2020-04-07	2	79	silent	left	14	Drought sounds	2
4	Drought sounds _2 per minute	1	4	2020-04-07	2	79	silent	left	14	Silence	0
4	Drought sounds _2 per minute	1	4	2020-04-07	3	80	resistor	right	14	Drought sounds	3
4	Drought sounds _2 per minute	1	4	2020-04-07	3	80	resistor	right	14	Silence	0
4	Drought sounds _2 per minute	1	4	2020-04-10	1	78	resistor	left	14	Drought sounds	0
4	Drought sounds _2 per minute	1	4	2020-04-10	1	78	resistor	left	14	Silence	2
4	Drought sounds _2 per minute	1	4	2020-04-10	2	79	silent	left	14	Drought sounds	0
4	Drought sounds _2 per minute	1	4	2020-04-10	2	79	silent	left	14	Silence	2
4	Drought sounds _2 per minute	1	4	2020-04-10	3	80	resistor	right	14	Drought sounds	1
4	Drought sounds _2 per minute	1	4	2020-04-10	3	80	resistor	right	14	Silence	1
4	Drought sounds _2 per minute	1	4	2020-04-12	1	78	resistor	left	14	Drought sounds	0
4	Drought sounds _2 per minute	1	4	2020-04-12	1	78	resistor	left	14	Silence	1
4	Drought sounds _2 per minute	1	4	2020-04-12	2	79	silent	left	14	Drought sounds	1
4	Drought sounds _2 per minute	1	4	2020-04-12	2	79	silent	left	14	Silence	0
4	Drought sounds _2 per minute	1	5	2020-05-14	3	85	resistor	left	11	Drought sounds	2
4	Drought sounds _2 per minute	1	5	2020-05-14	3	85	resistor	left	11	Silence	1
4	Drought sounds _2 per minute	1	5	2020-05-15	3	85	resistor	left	11	Drought sounds	0
4	Drought sounds _2 per minute	1	5	2020-05-15	3	85	resistor	left	11	Silence	1
4	Drought sounds _2 per minute	1	5	2020-05-17	3	85	resistor	left	11	Drought sounds	1
4	Drought sounds _2 per minute	1	5	2020-05-17	3	85	resistor	left	11	Silence	0
5	Plants_60 per minute	1	11	2019-11-05	2	28	resistor	right	8	Drought sounds +plant	1
5	Plants_60 per minute	1	11	2019-11-05	2	28	resistor	right	8	Plant	0
5	Plants_60 per minute	1	12	2019-12-02	3	36	silent	NaN	9	Drought sounds +plant	1
5	Plants_60 per minute	1	12	2019-12-02	3	36	silent	NaN	9	Plant	0
5	Plants_60 per minute	1	12	2019-12-04	1	35	resistor	left	9	Drought sounds +plant	1
5	Plants_60 per minute	1	12	2019-12-04	1	35	resistor	left	9	Plant	2
5	Plants_60 per minute	1	12	2019-12-05	1	35	resistor	left	9	Drought sounds +plant	1
5	Plants_60 per minute	1	12	2019-12-05	1	35	resistor	left	9	Plant	0
5	Plants_60 per minute	1	12	2019-12-05	3	36	silent	NaN	9	Drought sounds +plant	0
5	Plants_60 per minute	1	12	2019-12-05	3	36	silent	NaN	9	Plant	2
5	Plants_60 per minute	1	7	2020-07-07	1	100	resistor	right	10	Drought sounds +plant	1
5	Plants_60 per minute	1	7	2020-07-07	1	100	resistor	right	10	Plant	0
5	Plants_60 per minute	1	7	2020-07-07	3	102	resistor	left	10	Drought sounds +plant	2
5	Plants_60 per minute	1	7	2020-07-07	3	102	resistor	left	10	Plant	2
5	Plants_60 per minute	1	7	2020-07-08	1	100	resistor	right	10	Drought sounds +plant	2
5	Plants_60 per minute	1	7	2020-07-08	1	100	resistor	right	10	Plant	0
5	Plants_60 per minute	1	7	2020-07-08	3	102	resistor	left	10	Drought sounds +plant	0
5	Plants_60 per minute	1	7	2020-07-08	3	102	resistor	left	10	Plant	1
5	Plants_60 per minute	1	7	2020-07-09	1	100	resistor	right	10	Drought sounds +plant	1
5	Plants_60 per minute	1	7	2020-07-09	1	100	resistor	right	10	Plant	3
5	Plants_60 per minute	1	7	2020-07-09	3	102	resistor	left	10	Drought sounds +plant	0
5	Plants_60 per minute	1	7	2020-07-09	3	102	resistor	left	10	Plant	1
5	Plants_60 per minute	1	7	2020-07-10	1	100	resistor	right	10	Drought sounds +plant	3
5	Plants_60 per minute	1	7	2020-07-10	1	100	resistor	right	10	Plant	3
5	Plants_60 per minute	1	7	2020-07-12	1	100	resistor	right	10	Drought sounds +plant	0
5	Plants_60 per minute	1	7	2020-07-12	1	100	resistor	right	10	Plant	5
5	Plants_60 per minute	1	7	2020-07-12	3	102	resistor	left	10	Drought sounds +plant	0
5	Plants_60 per minute	1	7	2020-07-12	3	102	resistor	left	10	Plant	2
5	Plants_60 per minute	1	7	2020-07-16	4	106	silent	left	7	Drought sounds +plant	0
5	Plants_60 per minute	1	7	2020-07-16	4	106	silent	left	7	Plant	2
5	Plants_60 per minute	1	7	2020-07-28	2	108	silent	left	7	Drought sounds +plant	2
5	Plants_60 per minute	1	7	2020-07-28	2	108	silent	left	7	Plant	0
5	Plants_60 per minute	1	7	2020-07-29	4	110	silent	right	8	Drought sounds +plant	0
5	Plants_60 per minute	1	7	2020-07-29	4	110	silent	right	8	Plant	3
5	Plants_60 per minute	1	7	2020-07-31	3	109	resistor	left	7	Drought sounds +plant	0
5	Plants_60 per minute	1	7	2020-07-31	3	109	resistor	left	7	Plant	2
5	Plants_60 per minute	1	7	2020-08-03	4	110	silent	right	8	Drought sounds +plant	0
5	Plants_60 per minute	1	7	2020-08-03	4	110	silent	right	8	Plant	1
5	Plants_60 per minute	2	8	2021-08-14	3	182	resistor	left	12	Drought sounds +plant	1
5	Plants_60 per minute	2	8	2021-08-14	3	182	resistor	left	12	Plant	2
5	Plants_60 per minute	2	8	2021-08-17	2	183	silent	right	10	Drought sounds +plant	1
5	Plants_60 per minute	2	8	2021-08-17	2	183	silent	right	10	Plant	2
5	Plants_60 per minute	2	8	2021-08-21	3	184	resistor	right	10	Drought sounds +plant	1
5	Plants_60 per minute	2	8	2021-08-21	3	184	resistor	right	10	Plant	0
5	Plants_60 per minute	2	8	2021-08-21	2	185	silent	left	10	Drought sounds +plant	0
5	Plants_60 per minute	2	8	2021-08-21	2	185	silent	left	10	Plant	1
5	Plants_60 per minute	2	8	2021-08-29	2	186	silent	right	10	Drought sounds +plant	1
5	Plants_60 per minute	2	8	2021-08-29	2	186	silent	left	10	Plant	0
5	Plants_60 per minute	2	8	2021-08-30	3	187	resistor	left	10	Drought sounds +plant	0
5	Plants_60 per minute	2	8	2021-08-30	3	187	resistor	left	10	Plant	1
5	Plants_60 per minute	2	8	2021-09-01	3	188	resistor	right	12	Drought sounds +plant	2
5	Plants_60 per minute	2	8	2021-09-01	3	188	resistor	right	12	Plant	1
5	Plants_60 per minute	2	9	2021-09-03	3	189	resistor	left	14	Drought sounds +plant	1
5	Plants_60 per minute	2	9	2021-09-03	3	189	resistor	left	14	Plant	7
5	Plants_60 per minute	2	9	2021-09-03	2	190	silent	right	10	Drought sounds +plant	0
5	Plants_60 per minute	2	9	2021-09-03	2	190	silent	right	10	Plant	2
5	Plants_60 per minute	2	9	2021-09-07	3	191	resistor	right	8	Drought sounds +plant	1
5	Plants_60 per minute	2	9	2021-09-07	3	191	resistor	right	8	Plant	2
5	Plants_60 per minute	2	9	2021-09-07	2	192	silent	left	12	Drought sounds +plant	2
5	Plants_60 per minute	2	9	2021-09-07	2	192	silent	left	12	Plant	4
5	Plants_60 per minute	2	9	2021-09-08	3	193	resistor	left	10	Drought sounds +plant	1
5	Plants_60 per minute	2	9	2021-09-08	3	193	resistor	left	10	Plant	0
5	Plants_60 per minute	2	9	2021-09-08	2	194	silent	right	13	Drought sounds +plant	2
5	Plants_60 per minute	2	9	2021-09-08	2	194	silent	right	13	Plant	5
5	Plants_60 per minute	2	9	2021-09-09	3	195	resistor	right	9	Drought sounds +plant	3
5	Plants_60 per minute	2	9	2021-09-09	3	195	resistor	right	9	Plant	0
5	Plants_60 per minute	2	9	2021-09-09	2	196	silent	left	10	Drought sounds +plant	2
5	Plants_60 per minute	2	9	2021-09-09	2	196	silent	left	10	Plant	3
5	Plants_60 per minute	2	9	2021-09-13	3	197	resistor	left	13	Drought sounds +plant	2
5	Plants_60 per minute	2	9	2021-09-13	3	197	resistor	left	13	Plant	4
5	Plants_60 per minute	2	9	2021-09-13	2	198	silent	right	14	Drought sounds +plant	0
5	Plants_60 per minute	2	9	2021-09-13	2	198	silent	right	14	Plant	2
5	Plants_60 per minute	2	9	2021-09-19	3	199	resistor	right	9	Drought sounds +plant	4
5	Plants_60 per minute	2	9	2021-09-19	3	199	resistor	right	9	Plant	0
5	Plants_60 per minute	2	9	2021-09-19	2	200	silent	left	10	Drought sounds +plant	1
5	Plants_60 per minute	2	9	2021-09-19	2	200	silent	left	10	Plant	2
5	Plants_60 per minute	2	9	2021-09-20	3	201	resistor	left	7	Drought sounds +plant	1
5	Plants_60 per minute	2	9	2021-09-20	3	201	resistor	left	7	Plant	2
6	Bat	1	3	2020-03-29	1	71	resistor	left	10	Bat-echolocation	1
6	Bat	1	3	2020-03-29	1	71	resistor	left	10	Silence	0
6	Bat	1	4	2020-04-27	1	81	resistor	right	11	Bat-echolocation	1
6	Bat	1	4	2020-04-27	1	81	resistor	right	11	Silence	0
6	Bat	1	4	2020-04-27	2	82	resistor	right	10	Bat-echolocation	2
6	Bat	1	4	2020-04-27	2	82	resistor	right	10	Silence	1
6	Bat	1	4	2020-04-27	3	83	resistor	right	10	Bat-echolocation	5
6	Bat	1	4	2020-04-27	3	83	resistor	right	10	Silence	0
6	Bat	1	4	2020-04-30	2	82	resistor	right	10	Bat-echolocation	5
6	Bat	1	4	2020-04-30	2	82	resistor	right	10	Silence	1
6	Bat	1	4	2020-04-30	3	83	resistor	right	10	Bat-echolocation	0
6	Bat	1	4	2020-04-30	3	83	resistor	right	10	Silence	4
6	Bat	1	5	2020-05-22	3	86	resistor	right	9	Bat-echolocation	0
6	Bat	1	5	2020-05-22	3	86	resistor	right	9	Silence	1
6	Bat	1	5	2020-05-27	1	89	silent	right	12	Bat-echolocation	0
6	Bat	1	5	2020-05-27	1	89	silent	right	12	Silence	1
6	Bat	1	5	2020-05-28	1	88	silent	left	10	Bat-echolocation	0
6	Bat	1	5	2020-05-28	1	88	silent	left	10	Silence	1
6	Bat	1	5	2020-05-29	1	88	silent	left	10	Bat-echolocation	1
6	Bat	1	5	2020-05-29	1	88	silent	left	10	Silence	0
6	Bat	1	5	2020-05-29	1	89	silent	right	12	Bat-echolocation	0
6	Bat	1	5	2020-05-29	1	89	silent	right	12	Silence	1
6	Bat	1	6	2020-06-14	2	94	silent	right	13	Bat-echolocation	6
6	Bat	1	6	2020-06-14	2	94	silent	right	13	Silence	4
6	Bat	1	6	2021-06-28	1	176	resistor	left	10	Bat-echolocation	1
6	Bat	1	6	2021-06-28	1	176	resistor	left	10	Silence	0
6	Bat	1	6	2021-06-28	2	177	silent	left	10	Bat-echolocation	1
6	Bat	1	6	2021-06-28	2	177	silent	left	10	Silence	0
6	Bat	1	7	2021-07-03	1	178	resistor	left	10	Bat-echolocation	0
6	Bat	1	7	2021-07-03	1	178	resistor	left	10	Silence	1
6	Bat	1	7	2021-07-03	2	179	silent	right	10	Bat-echolocation	1
6	Bat	1	7	2021-07-03	2	179	silent	right	10	Silence	0
6	Bat	1	7	2021-07-03	3	180	resistor	left	10	Bat-echolocation	1
6	Bat	1	7	2021-07-03	3	180	resistor	left	10	Silence	0
6	Bat	1	7	2021-07-04	2	181	silent	right	10	Bat-echolocation	2
6	Bat	1	7	2021-07-04	2	181	silent	right	10	Silence	0
7	Males	1	10	2019-10-25	3	25	silent	right	8	Empty box	7
7	Males	1	10	2019-10-25	3	25	silent	right	8	Males	3
7	Males	1	10	2019-10-27	3	25	silent	right	8	Empty box	0
7	Males	1	10	2019-10-27	3	25	silent	right	8	Males	1
7	Males	1	10	2019-10-28	3	26	silent	left	8	Empty box	1
7	Males	1	10	2019-10-28	3	26	silent	left	8	Males	1
7	Males	1	10	2019-10-29	3	26	silent	left	8	Empty box	1
7	Males	1	10	2019-10-29	3	26	silent	left	8	Males	4
7	Males	1	12	2019-12-11	3	39	silent	left	11	Empty box	0
7	Males	1	12	2019-12-11	3	39	silent	left	11	Males	1
7	Males	1	12	2019-12-13	3	39	silent	left	11	Empty box	0
7	Males	1	12	2019-12-13	3	39	silent	left	11	Males	1
7	Males	1	12	2019-12-23	3	43	silent	left	11	Empty box	2
7	Males	1	12	2019-12-23	3	43	silent	left	11	Males	0
7	Males	1	12	2019-12-23	4	44	silent	right	11	Empty box	1
7	Males	1	12	2019-12-23	4	44	silent	right	11	Males	0
7	Males	1	12	2019-12-24	4	44	silent	right	11	Empty box	1
7	Males	1	12	2019-12-24	4	44	silent	right	11	Males	0
7	Males	1	12	2019-12-27	3	43	silent	left	11	Empty box	1
7	Males	1	12	2019-12-27	3	43	silent	left	11	Males	0
7	Males	1	2	2020-02-11	4	54	silent	right	12	Empty box	0
7	Males	1	2	2020-02-11	4	54	silent	right	12	Males	1
7	Males	1	2	2020-02-12	4	54	silent	right	12	Empty box	1
7	Males	1	2	2020-02-12	4	54	silent	right	12	Males	0
7	Males	1	2	2020-02-25	4	62	silent	right	10	Empty box	0
7	Males	1	2	2020-02-25	4	62	silent	right	10	Males	1
7	Males	1	2	2020-02-28	4	62	silent	right	10	Empty box	1
7	Males	1	2	2020-02-28	4	62	silent	right	10	Males	0
7	Males	1	3	2020-03-31	5	75	silent	right	10	Empty box	1
7	Males	1	3	2020-03-31	5	75	silent	right	10	Males	0
7	Males	1	3	2020-04-01	5	75	silent	right	10	Empty box	0
7	Males	1	3	2020-04-01	5	75	silent	right	10	Males	1
7	Males	1	3	2020-04-02	5	75	silent	right	10	Empty box	1
7	Males	1	3	2020-04-02	5	75	silent	right	10	Males	0
7	Males	1	6	2021-06-19	12	165	silent	right	10	Empty box	0
7	Males	1	6	2021-06-19	12	165	silent	right	10	Males	1
7	Males	1	6	2021-06-21	12	166	silent	right	10	Empty box	1
7	Males	1	6	2021-06-21	12	166	silent	right	10	Males	0
7	Males	1	6	2021-06-21	13	167	silent	right	10	Empty box	0
7	Males	1	6	2021-06-21	13	167	silent	right	10	Males	1
7	Males	1	6	2021-06-21	13	168	silent	right	10	Empty box	2
7	Males	1	6	2021-06-21	13	168	silent	right	10	Males	0
7	Males	1	6	2021-06-24	12	169	silent	right	20	Empty box	1
7	Males	1	6	2021-06-24	12	169	silent	right	20	Males	0
7	Males	1	6	2021-06-24	13	170	silent	left	20	Empty box	1
7	Males	1	6	2021-06-24	13	170	silent	right	20	Empty box	0
7	Males	1	6	2021-06-24	13	170	silent	left	20	Males	1
7	Males	1	6	2021-06-24	13	170	silent	right	20	Males	1
7	Males	1	6	2021-06-27	12	171	silent	left	20	Empty box	1
7	Males	1	6	2021-06-27	12	171	silent	left	20	Males	1
7	Males	1	6	2021-06-27	13	172	silent	left	20	Empty box	2
7	Males	1	6	2021-06-27	13	172	silent	left	20	Males	0
7	Males	1	6	2021-06-28	12	173	silent	left	15	Empty box	1
7	Males	1	6	2021-06-28	12	173	silent	left	15	Males	0
7	Males	1	6	2021-06-28	13	174	silent	right	15	Empty box	0
7	Males	1	6	2021-06-28	13	174	silent	right	15	Males	1
7	Males	1	6	2021-06-29	11	175	silent	left	20	Empty box	0
7	Males	1	6	2021-06-29	11	175	silent	left	20	Males	1
