# Supplementary material for: Female moths incorporate plant acoustic emissions into their oviposition decision-making process
Source: eLife journal article supplement (doi:10.7554/elife.104700), 2024-12-27
Supplement: data1 [file deaf_control_follow_no_cont.xlsx]

## Sheet: Sheet1
sn	date	up/down/side	left	right	Number of moths	deafend/control	number of patches-transistor	number of patches- Speaker	Clutches
2	2022-04-12	down	transistor	speaker	10	deafend	1	0	1
3	2022-06-12	up	speaker	transistor	6	deafend	0	0	0
6	13/12/2022	down	speaker	transistor	12	deafend	0	0	0
7	28/01/2023	up	speaker	transistor	9	deafend	0	0	0
9	2023-02-26	up	speaker	transistor	8	deafend	0	0	0
10	2023-02-26	down	transistor	speaker	8	deafend	0	0	0
11	2023-02-26	side	speaker	transistor	8	deafend	1	0	1
12	2023-02-27	up	transistor	speaker	11	deafend	0	0	0
13	2023-02-27	down	speaker	transistor	11	deafend	0	0	0
14	2023-02-27	side	speaker	transistor	10	deafend	0	2	2
15	2023-02-28	up	speaker	transistor	12	deafend	0	0	0
16	2023-02-28	down	transistor	speaker	12	deafend	4	0	4
17	2023-02-28	side	speaker	transistor	10	deafend	0	0	0
18	2023-03-01	up	transistor	speaker	9	deafend	0	0	0
19	2023-03-01	down	speaker	transistor	8	deafend	1	1	2
20	2023-03-01	side	speaker	transistor	11	deafend	0	0	0
21	2023-03-02	up	speaker	transistor	12	deafend	1	0	1
22	2023-03-02	down	transistor	speaker	11	deafend	0	0	0
23	2023-03-02	side	speaker	transistor	10	deafend	1	0	1
24	2023-03-05	up	transistor	speaker	9	deafend	0	1	1
25	2023-03-05	down	speaker	transistor	8	deafend	2	1	3
26	2023-03-05	side	speaker	transistor	10	deafend	0	0	0
27	2023-03-06	up	speaker	transistor	9	deafend	0	0	0
28	2023-03-06	down	transistor	speaker	9	deafend	0	0	0
29	2023-03-06	side	speaker	transistor	8	deafend	0	0	0
30	2023-03-07	up	transistor	speaker	11	deafend	0	1	1
31	2023-03-07	down	speaker	transistor	10	deafend	0	0	0
32	2023-03-07	side	speaker	transistor	12	deafend	0	0	0
33	2023-03-08	up	speaker	transistor	9	deafend	1	0	1
34	2023-03-08	down	transistor	speaker	9	deafend	0	0	0
35	2023-03-08	side	speaker	transistor	10	deafend	0	0	0
36	2023-03-09	up	transistor	speaker	11	deafend	0	0	0
37	2023-03-09	down	speaker	transistor	12	deafend	0	1	1
38	2023-03-09	side	speaker	transistor	11	deafend	1	1	2
39	2023-03-12	up	speaker	transistor	10	deafend	0	0	0
40	2023-03-12	down	transistor	speaker	9	deafend	0	0	0
41	2023-03-12	side	speaker	transistor	8	deafend	0	0	0
42	2023-03-13	up	transistor	speaker	10	deafend	0	0	0
43	2023-03-13	down	speaker	transistor	11	deafend	0	0	0
44	2023-03-13	side	speaker	transistor	9	deafend	0	0	0
45	2023-03-14	up	speaker	transistor	10	deafend	0	2	2
46	2023-03-14	down	transistor	speaker	9	deafend	0	0	0
47	2023-03-14	side	speaker	transistor	8	deafend	0	0	0
48	2023-03-15	up	transistor	speaker	8	deafend	0	0	0
49	2023-03-15	down	speaker	transistor	8	deafend	0	0	0
50	2023-03-15	side	speaker	transistor	11	deafend	0	0	0
51	2023-03-16	up	speaker	transistor	10	deafend	1	0	1
52	2023-03-16	down	transistor	speaker	10	deafend	0	0	0
53	2023-03-16	side	speaker	transistor	9	deafend	0	0	0
54	2023-04-18	up	speaker	transistor	8	deafend	0	1	1
55	2023-04-18	down	transistor	speaker	10	deafend	0	0	0
56	2023-04-19	up	speaker	transistor	8	deafend	3	0	3
57	2023-04-19	down	transistor	speaker	13	deafend	1	0	1
58	2023-04-20	up	transistor	speaker	8	deafend	0	0	0
59	2023-04-20	down	speaker	transistor	8	deafend	0	0	0
60	2023-04-23	up	speaker	transistor	8	deafend	0	0	0
61	2023-04-23	down	transistor	speaker	8	deafend	0	0	0
62	2023-04-24	up	transistor	speaker	8	deafend	0	0	0
63	2023-04-24	down	speaker	transistor	13	deafend	0	0	0
64	2023-05-07	up	speaker	transistor	8	deafend	0	0	0
65	2023-05-07	down	transistor	speaker	8	deafend	0	0	0
66	2023-05-08	up	transistor	speaker	12	deafend	3	0	3
67	2023-05-08	down	speaker	transistor	8	deafend	0	0	0
68	2023-05-09	up	speaker	transistor	6	deafend	0	1	1
69	2023-05-09	down	transistor	speaker	6	deafend	0	0	0
70	2023-05-11	up	speaker	transistor	8	deafend	0	0	0
71	2023-05-11	down	transistor	speaker	8	deafend	0	0	0
72	2023-05-14	down	transistor	speaker	12	deafend	0	0	0
73	2023-05-14	up	speaker	transistor	10	deafend	0	0	0
74	2023-05-22	up	transistor	speaker	8	deafend	1	1	2
75	2023-05-22	down	speaker	transistor	8	deafend	0	0	0
76	2023-05-23	up	speaker	transistor	8	deafend	0	2	2
77	2023-05-23	down	transistor	speaker	8	deafend	0	0	0
78	2023-05-24	up	transistor	speaker	8	deafend	0	0	0
79	2023-05-24	down	speaker	transistor	8	deafend	0	0	0
80	2023-05-29	up	speaker	transistor	8	deafend	1	1	2
81	2023-05-29	down	transistor	speaker	8	deafend	0	0	0
82	2023-05-31	up	transistor	speaker	8	deafend	0	0	0
83	2023-05-31	down	speaker	transistor	8	deafend	0	0	0
